# Supplementary material for: A Faculty Professional Development Model That Improves Student Learning, Encourages Active-Learning Instructional Practices, and Works for Faculty at Multiple Institutions
Source: Atypon-hosted journal article supplement (doi:10.1187/cbe.17-12-0260), 2018-05-11
Supplement: combinedsupmats.pdf [file combinedsupmats.pdf]

# Supplemental Material

*CBE—Life Sciences Education*

Pelletreau *et al.*

**Supplemental Figure 1.** Example of how the faculty modified a clicker question from Version 1 to Version 2 of the instructional unit.

### Version 1

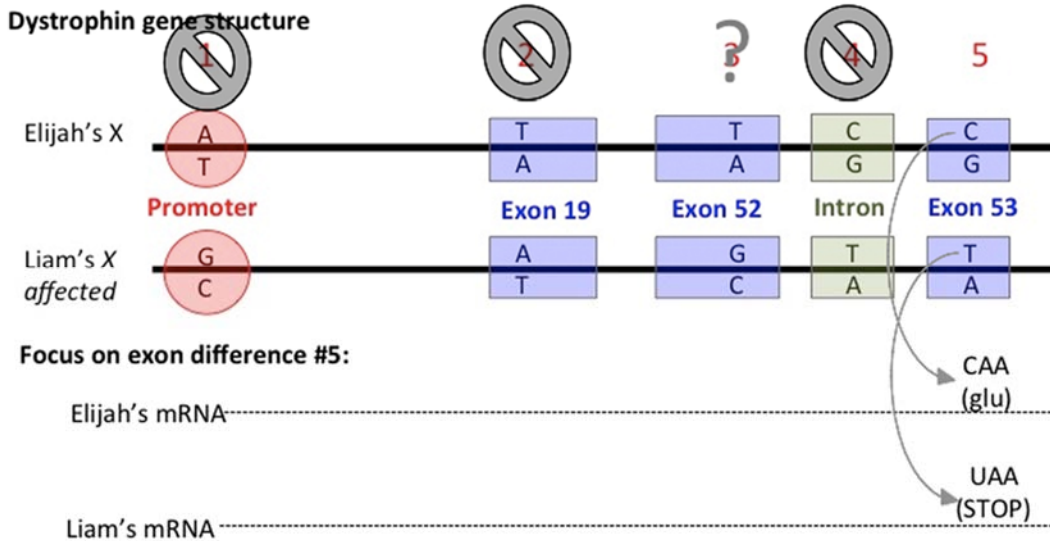

**Q8: Will difference #5 cause the mRNA to be shorter in Liam?**

- A. Yes
- B. No (*correct*)

### Version 2

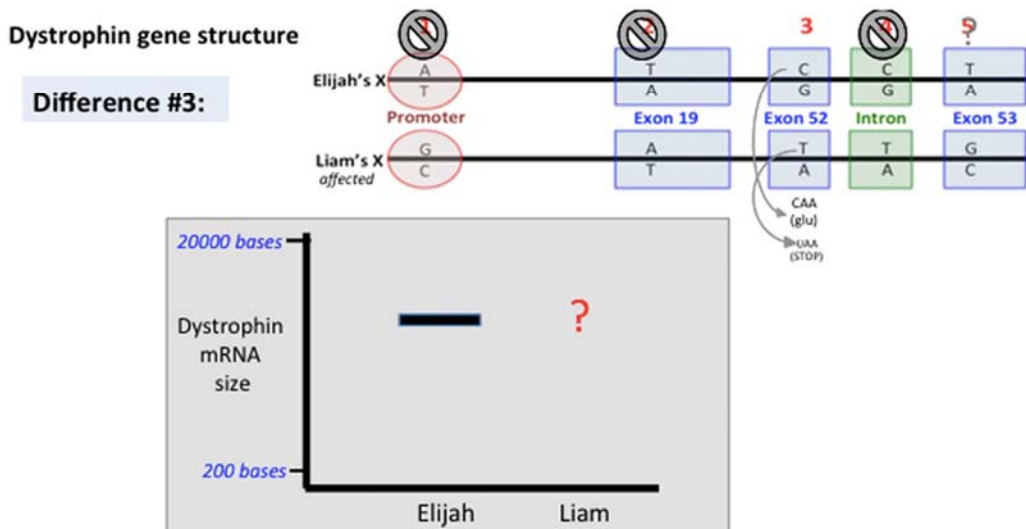

**Q5: What do you predict will be the effect of the premature stop codon on mRNA size? It will result in:**

- A. a shorter mRNA in Liam.
- B. a longer mRNA in Liam.
- C. the same size mRNA in both Liam and Elijah. (*correct*)

**Supplemental Figure 2.** Final exam questions used by faculty who taught the instructional unit. Correct responses are in blue font.

**Question #1: Addresses a conceptual difficulty about DNA replication**

Below are two different mutations of a DNA sequence in a eukaryotic organism.

Original DNA sequence (coding strand), starting at the beginning of the gene:

Normal: ATGATCTCCTAATATAA

Mutation: **TTGATCTCCTAATATAA**

Original DNA sequence (coding strand), starting at the beginning of the gene:

Normal: ATGATCTTCCTAATATAA

Mutation: ATGATCTTCCTAAGATAA

In the sequences above (that show mutations in the bold underline), which mutation would stop DNA replication?

- A. Both
- B. **Neither**
- C. Only the first mutation
- D. Only the second mutation

**Question #2: Addresses a conceptual difficulty about transcription**

A student was asked the following question: "The following DNA sequence occurs near the middle of the coding region of a gene.

DNA: 5' A A T G A A T G G\* G A G C C T G A A G G A 3'

There is a G to A base change at the position marked with an asterisk. Consequently, a codon normally encoding an amino acid becomes a stop codon. How will this alteration influence transcription?"

The student responded with the following:

"When the transcription process reaches a stop codon, transcription will end, causing a shorter mRNA"

How would you re-word this statement to more accurately describe the affect of this mutation?

- A. This statement is accurate as written
- B. "When the RNA polymerase reaches that stop codon, transcription will end, causing a shorter mRNA and protein."
- C. **"When the transcription machinery reaches nucleotides that code for a stop codon, it will not be affected by the base pair change and transcription will proceed normally."**
- D. "When the transcription process reaches that stop codon, transcription will terminate early, resulting in a shorter protein."

**Supplemental Figure 3.** Collapsed code COPUS data for the faculty on 1-2 days when they did *not* teach the instructional unit (1,2; solid bars) and on days when the instructional unit was taught (IU; hatched bars). The semester is noted after the instructor name if the same instructor taught Version 3 more than once (F=fall and S=spring).

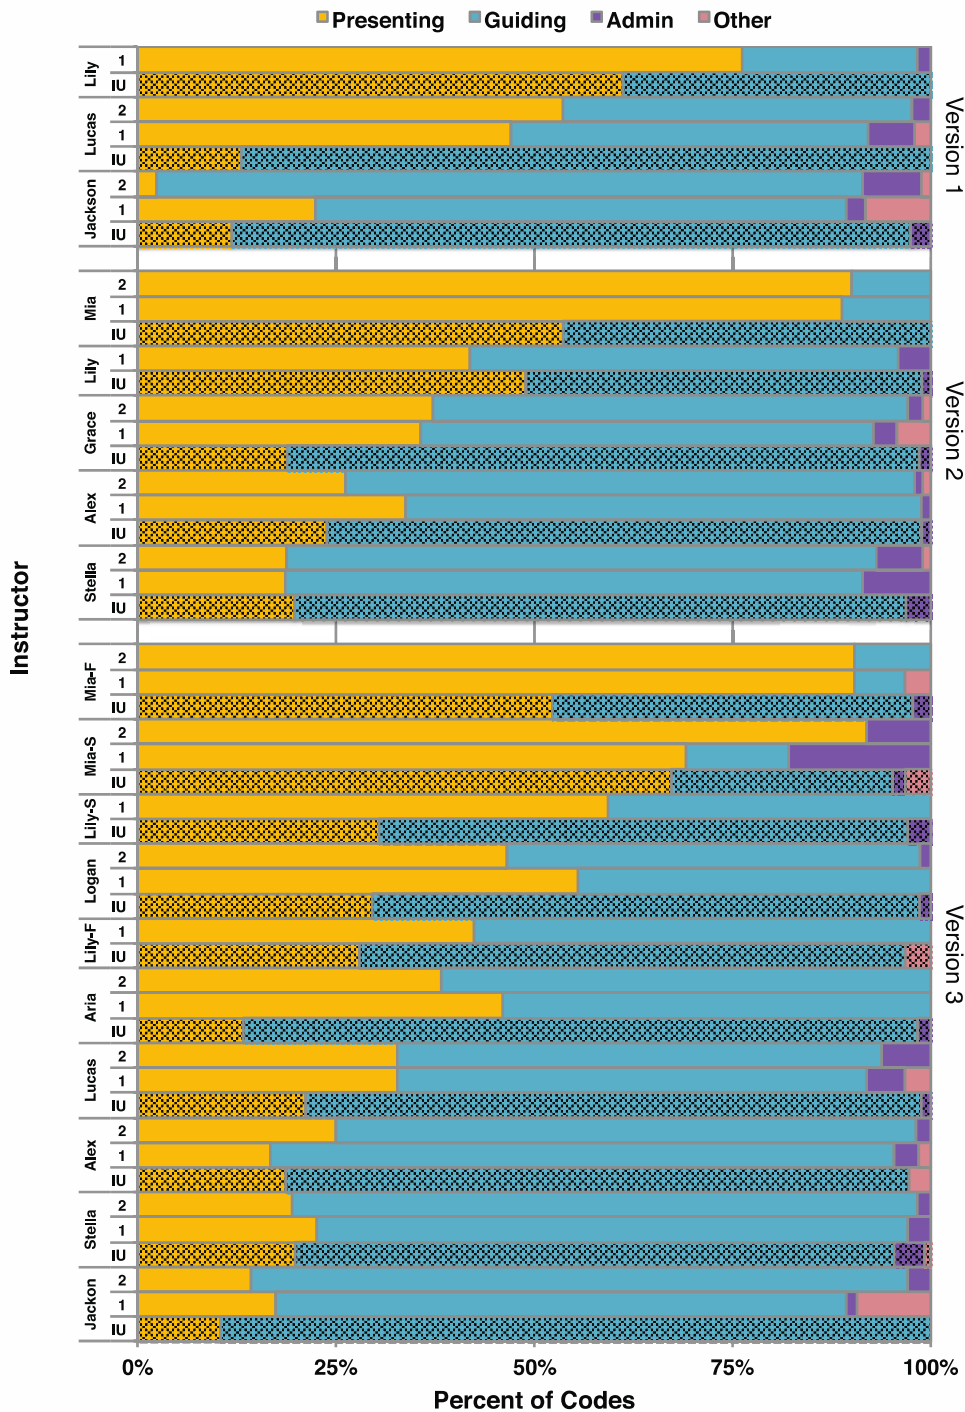

**Supplemental Table 1:** Information about the faculty including total years teaching, current position, and role: D – developer, T – taught the unit, I – interview participant.

| <b>Instructor Pseudonym</b> | <b>Total Years Teaching</b> | <b>Position</b>     | <b>Role in Instructional Unit Development</b> |
|-----------------------------|-----------------------------|---------------------|-----------------------------------------------|
| Logan                       | 3                           | Lecturer            | D,T                                           |
| Ethan                       | 5                           | Assistant Professor | D                                             |
| Grace                       | 6                           | Lecturer            | D,T                                           |
| Aiden                       | 9                           | Associate Professor | D,I                                           |
| Stella                      | 9                           | Associate Professor | D,T                                           |
| Charlotte                   | 10                          | Academic Specialist | D,I                                           |
| Jackson                     | 12                          | Assistant Professor | D,T,I                                         |
| Lucas                       | 16                          | Lecturer            | D,T,I                                         |
| Alex                        | 17                          | Associate Professor | D,T,I                                         |
| Mia                         | 17                          | Lecturer            | D,T,I                                         |
| Emma                        | 19                          | Associate Professor | D,I                                           |
| Chloe                       | 20                          | Senior Lecturer     | D,I                                           |
| Aria                        | 22                          | Associate Professor | D,I                                           |
| Blake                       | 22                          | Associate Professor | D,I                                           |
| Sophia                      | 22                          | Professor           | D,I                                           |
| Lily                        | 33                          | Senior Lecturer     | D,T,I                                         |

**Supplemental Table 2:** Information on the type of courses and number of student responses on the stop codon questions for each version of the instructional unit. Student responses are included if they answered the pre- and post-assessment questions, and were in class for the instructional unit (attendance based on answering clicker questions). The number of responses is marked as not available in classes where it was not possible to link students present in class on the day of the instructional unit with the pre-post responses. Version 3 of the activity was taught in the fall 2015, spring 2016, and fall 2016 semesters. The semester is noted after the instructor name if the same instructor taught Version 3 more than once (F=fall and S=spring). Abbreviations for the courses are Intro Bio: Introductory Biology for Majors; Intro M&C: Introduction to Molecular and Cell Biology for Majors; Intro Genetics: Introduction to Genetics for Majors; and Non Majors: Non Majors Biology.

| Instructor                                 | Course         | Number of Responses |
|--------------------------------------------|----------------|---------------------|
| <i>No Instructional Unit (Fall 2014)</i>   |                |                     |
| Riley                                      | Intro Bio      | 407                 |
| <i>Version 1 (Fall 2014)</i>               |                |                     |
| Jackson                                    | Intro M&C      | 122                 |
| Lily                                       | Intro M&C      | 201                 |
| Lucas                                      | Intro Bio      | 251                 |
| <i>Version 2 (Spring 2015)</i>             |                |                     |
| Lily                                       | Intro M&C      | 61                  |
| Stella                                     | Intro Genetics | 72                  |
| Grace                                      | Non Majors     | 85                  |
| Alex                                       | Intro Genetics | 201                 |
| Mia                                        | Intro M&C      | not available       |
| <i>Version 3 (Fall 2015 - Spring 2016)</i> |                |                     |
| Jackson                                    | Non Majors     | 33                  |
| Stella                                     | Intro Genetics | 62                  |
| Aria                                       | Intro M&C      | 80                  |
| Lily (S)                                   | Intro M&C      | 82                  |
| Logan                                      | Non Majors     | 99                  |
| Lily (F)                                   | Intro M&C      | 268                 |
| Alex                                       | Intro Bio      | 342                 |
| Mia (F)                                    | Intro M&C      | not available       |
| Mia (S)                                    | Intro M&C      | not available       |
| <i>Version 3 (Fall 2016)</i>               |                |                     |
| Lucas                                      | Intro Bio      | 218                 |
|                                            |                |                     |
| <b>Total Number:</b>                       |                | <b>2177</b>         |



**Supplemental Table 4.** Percentage of students who answered correctly on the pre-assessment and also answered correctly on the post-assessment AACR stop codon questions.

|               | <b>Version 1</b> | <b>Version 2</b> | <b>Version 3</b> |
|---------------|------------------|------------------|------------------|
| Replication   | 84               | 93               | 82               |
| Transcription | 73               | 86               | 79               |
| Translation   | 71               | 89               | 83               |
